# Supplementary material for: Li4Na2CsB7O14: a new edge-sharing [BO4]5− tetrahedra containing borate with high anisotropic thermal expansion
Source: Royal Society of Chemistry journal article supplement (doi:10.1039/c8cc09422e), 2018-12-26
Supplement: c8cc09422e1.pdf [file c8cc09422e1.pdf]

## Electronic Supplementary Information

### **Li<sub>4</sub>Na<sub>2</sub>CsB<sub>7</sub>O<sub>14</sub>: a new edge-sharing [BO<sub>4</sub>]<sup>5-</sup> tetrahedra containing borate with high anisotropic thermal expansion**

Miriding Mutailipu,<sup>ab#</sup> Min Zhang,<sup>a#</sup> Hao Li,<sup>ab</sup> Xiao Fan,<sup>cb</sup> Zhihua Yang,<sup>a</sup> Gang Wang,<sup>c\*</sup> Shifeng Jin,<sup>c</sup> and Shilie Pan<sup>a\*</sup>

<sup>[a]</sup>CAS Key Laboratory of Functional Materials and Devices for Special Environments; Xinjiang Technical Institute of Physics & Chemistry, CAS; Xinjiang Key Laboratory of Electronic Information Materials and Devices, 40-1 South Beijing Road, Urumqi 830011, China

<sup>[b]</sup>University of Chinese Academy of Sciences, Beijing 100049, China

<sup>[c]</sup>Research and Development Center for Functional Crystals, Beijing National Laboratory for Condensed Matter Physics, Institute of Physics, Chinese Academy of Sciences, Beijing 100190, China

# These authors contributed equally.

\*Corresponding authors, E-mails: gangwang@iphy.ac.cn; slpan@ms.xjb.ac.cn

## Experimental Section

### 1. Raw materials

All the raw materials including  $\text{Li}_2\text{CO}_3$  (LiF) (99.9%),  $\text{Na}_2\text{CO}_3$  (99.99%),  $\text{Cs}_2\text{CO}_3$  (CsF) (99%), and  $\text{B}_2\text{O}_3$  (99.99), were purchased from Aladdin and used as Li, Na, Cs, and B-based precursors for the targeted  $\text{Li}_4\text{Na}_2\text{CsB}_7\text{O}_{14}$  phase.

### 2. The single crystal growth and solid-state synthesis of $\text{Li}_4\text{Na}_2\text{CsB}_7\text{O}_{14}$

Single crystals of  $\text{Li}_4\text{Na}_2\text{CsB}_7\text{O}_{14}$  were grown by the high-temperature solution method using LiF-CsF as the flux system in an open atmosphere. A mixture of LiF (0.1038 g, 4 mmol),  $\text{Na}_2\text{CO}_3$  (0.1060 g, 1 mmol), CsF (0.1519 g, 1 mmol), and  $\text{B}_2\text{O}_3$  (0.2785 g, 4 mmol) were mixed in an agate mortar, and then moved to a platinum crucible, which were placed in a homemade furnace. The samples were heated at the rate of 100 °C/hour from the room temperature to 630 °C, held for 24 hours, then cooled to 530°C at a rate of 0.5 °C/hour, and then slowly cooled to the room temperature at a rate of 15 °C/hour. Small single crystals were found in the platinum crucible after growth and several single crystals were picked up for further single-crystal X-ray diffraction measurements.

Polycrystalline sample of title compound was synthesized using the solid-state reaction method by mixing  $\text{Li}_2\text{CO}_3$ ,  $\text{Na}_2\text{CO}_3$ ,  $\text{Cs}_2\text{CO}_3$ , and  $\text{B}_2\text{O}_3$  according to the stoichiometric ratio. The mixture was preheated at 500 °C for 72 hours. After that, the temperature was gradually raised to 620 °C with several intermediate grindings and mixings, and then held at a certain temperature for 120 hours. Powder X-ray diffraction (PXRD) data were collected using a Bruker D2 PHASER diffractometer at room temperature, with the  $2\theta$  ranging from 5 to 70°. The PXRD pattern of polycrystalline sample shows good agreements with the calculated ones (Figure S1). The PXRD data under 300, 400, 500, 600, 700, 800, and 850 K were collected on a Rigaku SmartLab SE powder diffractometer with Cu-K $\alpha$  radiation and further indexed by Dicvol06.

### 3. Structure determination

The colorless  $\text{Li}_4\text{Na}_2\text{CsB}_7\text{O}_{14}$  single crystal with dimensions about  $0.11 \times 0.10 \times 0.08 \text{ mm}^3$  was selected for single-crystal X-ray diffraction. Single-crystal X-ray

diffraction data were collected at room temperature using an APEX II CCD diffractometer using monochromatic Mo K $\alpha$  radiation and integrated with the SAINT program.<sup>1</sup> The crystal structure was determined through the direct methods and refined by full-matrix least-squares fitting on F<sup>2</sup> using SHELXL.<sup>2</sup> The program PLATON was used for verifying possible missing symmetry elements,<sup>3</sup> but no higher symmetries were found. Crystal data and details of the crystal parameters, data collection, and refinement are listed in Table S1. The atomic coordinates equivalent isotropic displacement parameters, bond valence sum, and selected bond lengths are summarized in Tables S2-S4, respectively.

#### **4. Thermal behavior analysis**

Thermal gravimetric analysis and differential scanning calorimetry of Li<sub>4</sub>Na<sub>2</sub>CsB<sub>7</sub>O<sub>14</sub> were investigated using a NETZSCH STA 449C simultaneous thermal analyzer. The samples and reference Al<sub>2</sub>O<sub>3</sub> were placed in a platinum crucible and heated from 40 to 800°C at a rate of 5 °C/min, then cooled to 200°C at a rate of 5 °C/min under flowing nitrogen.

#### **5. Calculation methods**

Theoretical calculations including electronic structure and refractive index were based on the methods of density functional theory.<sup>4</sup> The calculations employ the plane-wave pseudopotential method of the CASTEP module.<sup>5</sup> The optimized normconserving pseudopotential<sup>6</sup> in Kleiman-Bylander form for Li 2s<sup>1</sup>, Na 2s<sup>2</sup> 2p<sup>6</sup> 3s<sup>1</sup>, Cs 5s<sup>2</sup> 5p<sup>6</sup> 6s<sup>1</sup>, B 2s<sup>2</sup> 2p<sup>1</sup>, and O 2s<sup>2</sup> 2p<sup>4</sup> allows us to use a small plane basis set without compromising the accuracy required by the calculation. The exchange correlation interaction was treated by the Generalized Gradient Approximation with the Perdew-Burke-Ernzerhof functional.<sup>7</sup> A kinetic energy cutoff of 830 eV and a Monkhorst-Pack k-point mesh with a density of 2 × 2 × 1 points in the Brillouin zone were chosen for the unit cell. The convergence tests show that these calculation parameters are adequate for this study.

**Table S1.** Crystal data and structure refinements of  $\text{Li}_4\text{Na}_2\text{CsB}_7\text{O}_{14}$ .

|                                                     |                                                           |
|-----------------------------------------------------|-----------------------------------------------------------|
| Empirical formula                                   | $\text{Li}_4\text{Na}_2\text{CsB}_7\text{O}_{14}$         |
| Formula weight                                      | 506.32                                                    |
| Wavelength (Å)                                      | 0.71073                                                   |
| Temperature (K)                                     | 296(2)                                                    |
| Crystal system                                      | Triclinic                                                 |
| Space group                                         | $P\bar{1}$                                                |
| $a$ (Å)                                             | 6.9395(1)                                                 |
| $b$ (Å)                                             | 8.842(2)                                                  |
| $c$ (Å)                                             | 10.522(3)                                                 |
| $\alpha$ (°)                                        | 95.774(3)                                                 |
| $\beta$ (°)                                         | 105.704(2)                                                |
| $\gamma$ (°)                                        | 97.395(3)                                                 |
| $Z$                                                 | 2                                                         |
| Volume (Å <sup>3</sup> )                            | 610.1(3)                                                  |
| Density (calc.) (g/cm <sup>3</sup> )                | 2.756                                                     |
| Absorption coefficient (mm <sup>-1</sup> )          | 3.187                                                     |
| $F(000)$                                            | 472                                                       |
| Crystal size (mm <sup>3</sup> )                     | 0.11×0.10×0.08                                            |
| Theta range for data collection                     | 2.35 to 27.53                                             |
| Limiting indices                                    | $-9 \leq h \leq 8, -8 \leq k \leq 11, -13 \leq l \leq 13$ |
| Reflections collected / unique                      | 3767 / 2708<br>[R(int) = 0.0167]                          |
| Completeness to $\theta=27.53$                      | 98.0%                                                     |
| Data / restraints / parameters                      | 2708 / 0 / 253                                            |
| Goodness-of-fit on $F^2$                            | 1.026                                                     |
| Final R indices [ $I > 2\sigma(I)$ ] <sup>[a]</sup> | $R_1 = 0.0332, wR_2 = 0.0770$                             |
| R indices (all data) <sup>[a]</sup>                 | $R_1 = 0.0375, wR_2 = 0.0795$                             |
| Largest diff. peak and hole (e/Å <sup>3</sup> )     | 1.642 and -1.405                                          |

$${}^aR_1 = \frac{\Sigma|F_0| - |F_c|}{\Sigma|F_0|} \text{ and } wR_2 = [\Sigma w(F_0^2 - F_c^2)^2 / \Sigma w F_0^4]^{1/2} \text{ for } F_0^2 > 2\sigma(F_0^2).$$

**Table S2.** Atomic coordinates equivalent isotropic displacement parameters and bond valence sum (BVS) for  $\text{Li}_4\text{Na}_2\text{CsB}_7\text{O}_{14}$ .

| Atoms | $x$         | $y$        | $z$        | $U_{\text{eq}}(\text{\AA}^2)$ | BVS   |
|-------|-------------|------------|------------|-------------------------------|-------|
| Cs(1) | 0.9441(1)   | 0.9485(1)  | 0.2222(1)  | 0.030(1)                      | 0.871 |
| Na(1) | 0.8190(2)   | 0.4178(2)  | 0.1841(2)  | 0.019(1)                      | 1.116 |
| Na(2) | 0.5674(2)   | 0.5872(2)  | 0.3348(2)  | 0.020(1)                      | 1.045 |
| Li(1) | -0.3745(11) | 0.1558(9)  | -0.0521(8) | 0.031(2)                      | 1.121 |
| Li(2) | 0.2340(12)  | 0.6089(10) | 0.1257(7)  | 0.032(2)                      | 0.876 |
| Li(3) | 0.4349(10)  | 0.1437(8)  | 0.5322(6)  | 0.018(1)                      | 1.072 |
| Li(4) | 0.2567(10)  | 0.3245(7)  | 0.3142(6)  | 0.017(1)                      | 1.035 |
| B(1)  | 0.4113(6)   | 0.4019(4)  | 0.0054(4)  | 0.009(1)                      | 3.024 |
| B(2)  | 0.8310(6)   | 0.3894(5)  | 0.6169(4)  | 0.011(1)                      | 2.989 |
| B(3)  | 1.0315(6)   | 0.2773(5)  | 0.4794(4)  | 0.011(1)                      | 2.986 |
| B(4)  | 0.835(6)    | 0.2849(5)  | 0.0383(4)  | 0.012(1)                      | 3.035 |
| B(5)  | 0.4924(6)   | -0.0189(5) | 0.2742(4)  | 0.013(1)                      | 3.023 |
| B(6)  | 0.6531(6)   | 0.2436(5)  | 0.3884(4)  | 0.011(1)                      | 3.066 |
| B(7)  | 0.4177(5)   | 0.2044(4)  | 0.1523(4)  | 0.010(1)                      | 3.060 |
| O(1)  | 0.4580(4)   | 0.0458(3)  | 0.1566(2)  | 0.013(1)                      | 2.083 |
| O(2)  | 0.4610(4)   | -0.1698(3) | 0.2712(3)  | 0.019(1)                      | 1.838 |
| O(3)  | -0.1161(4)  | 0.2642(3)  | 0.0041(3)  | 0.016(1)                      | 2.107 |
| O(4)  | 1.0157(4)   | 0.3481(3)  | 0.6033(2)  | 0.017(1)                      | 1.978 |
| O(5)  | 0.5672(4)   | 0.0809(3)  | 0.3948(2)  | 0.013(1)                      | 2.040 |
| O(6)  | 0.4793(3)   | 0.2607(3)  | 0.0427(2)  | 0.009(1)                      | 2.148 |
| O(7)  | 1.2080(4)   | 0.2460(3)  | 0.4689(2)  | 0.015(1)                      | 1.978 |
| O(8)  | 0.4838(4)   | 0.4562(3)  | -0.1044(2) | 0.012(1)                      | 1.982 |
| O(9)  | 0.1957(3)   | 0.2038(3)  | 0.1313(2)  | 0.013(1)                      | 2.085 |
| O(10) | 0.8274(4)   | 0.4808(3)  | 0.7244(2)  | 0.012(1)                      | 1.979 |
| O(11) | 0.8581(3)   | 0.2478(3)  | 0.3728(2)  | 0.014(1)                      | 1.994 |
| O(12) | 0.1901(4)   | 0.3881(3)  | -0.0200(2) | 0.014(1)                      | 2.025 |
| O(13) | 0.6577(3)   | 0.3358(3)  | 0.5136(2)  | 0.014(1)                      | 2.000 |
| O(14) | 0.5225(3)   | 0.3029(3)  | 0.2804(2)  | 0.010(1)                      | 2.082 |

**Table S3.** Anisotropic displacement parameters ( $\text{\AA}^2$ ) for  $\text{Li}_4\text{Na}_2\text{CsB}_7\text{O}_{14}$ .

| Atom  | $U_{11}$ | $U_{22}$ | $U_{33}$ | $U_{23}$  | $U_{13}$ | $U_{12}$  |
|-------|----------|----------|----------|-----------|----------|-----------|
| Cs(1) | 0.034(1) | 0.022(1) | 0.037(1) | -0.005(1) | 0.020(1) | -0.001(1) |
| Na(1) | 0.015(1) | 0.024(1) | 0.016(1) | 0.001(1)  | 0.003(1) | 0.005(1)  |
| Na(2) | 0.022(1) | 0.020(1) | 0.016(1) | -0.003(1) | 0.003(1) | 0.003(1)  |
| Li(1) | 0.019(3) | 0.028(4) | 0.041(4) | -0.020(3) | 0.012(3) | -0.003(3) |
| Li(2) | 0.039(4) | 0.050(5) | 0.023(4) | 0.025(4)  | 0.019(3) | 0.032(4)  |
| Li(3) | 0.023(3) | 0.023(3) | 0.011(3) | 0.005(2)  | 0.008(2) | 0.007(3)  |
| Li(4) | 0.023(3) | 0.013(3) | 0.018(3) | 0.004(2)  | 0.012(2) | 0.005(2)  |
| B(1)  | 0.012(2) | 0.008(2) | 0.008(2) | 0.001(1)  | 0.004(1) | 0.000(1)  |
| B(2)  | 0.012(2) | 0.010(2) | 0.011(2) | 0.004(1)  | 0.005(1) | 0.004(1)  |
| B(3)  | 0.011(2) | 0.013(2) | 0.010(2) | 0.005(1)  | 0.003(1) | 0.003(1)  |
| B(4)  | 0.012(2) | 0.011(2) | 0.012(2) | -0.003(1) | 0.005(1) | 0.001(1)  |
| B(5)  | 0.013(2) | 0.015(2) | 0.011(2) | 0.003(2)  | 0.004(1) | 0.005(2)  |
| B(6)  | 0.012(2) | 0.013(2) | 0.009(2) | 0.000(1)  | 0.002(1) | 0.003(1)  |
| B(7)  | 0.010(2) | 0.011(2) | 0.009(2) | 0.002(1)  | 0.004(1) | 0.001(1)  |
| O(1)  | 0.023(1) | 0.009(1) | 0.007(1) | 0.001(1)  | 0.003(1) | 0.005(1)  |
| O(2)  | 0.031(2) | 0.012(1) | 0.013(1) | 0.002(1)  | 0.004(1) | 0.002(1)  |
| O(3)  | 0.010(1) | 0.019(1) | 0.017(1) | 0.001(1)  | 0.003(1) | 0.003(1)  |
| O(4)  | 0.012(1) | 0.026(2) | 0.010(1) | -0.003(1) | 0.002(1) | 0.004(1)  |
| O(5)  | 0.017(1) | 0.014(1) | 0.008(1) | 0.002(1)  | 0.002(1) | 0.000(1)  |
| O(6)  | 0.011(1) | 0.007(1) | 0.009(1) | 0.003(1)  | 0.005(1) | 0.002(1)  |
| O(7)  | 0.013(1) | 0.020(1) | 0.014(1) | 0.005(1)  | 0.005(1) | 0.006(1)  |
| O(8)  | 0.017(1) | 0.008(1) | 0.010(1) | 0.002(1)  | 0.004(1) | -0.001(1) |
| O(9)  | 0.010(1) | 0.017(1) | 0.011(1) | 0.004(1)  | 0.003(1) | 0.001(1)  |
| O(10) | 0.016(1) | 0.012(1) | 0.010(1) | 0.001(1)  | 0.004(1) | 0.004(1)  |
| O(11) | 0.009(1) | 0.022(1) | 0.011(1) | 0.001(1)  | 0.003(1) | 0.004(1)  |
| O(12) | 0.011(1) | 0.016(1) | 0.017(1) | 0.007(1)  | 0.003(1) | 0.004(1)  |
| O(13) | 0.010(1) | 0.020(1) | 0.010(1) | -0.002(1) | 0.002(1) | 0.003(1)  |
| O(14) | 0.012(1) | 0.010(1) | 0.008(1) | -0.001(1) | 0.000(1) | 0.002(1)  |

**Table S4.** The infrared (IR) spectra and calculated vibrational modes of  $\text{Li}_4\text{Na}_2\text{CsB}_7\text{O}_{14}$ .

| <b>Experimental IR wavenumber<br/>(<math>\text{cm}^{-1}</math>)</b> | <b>Theoretical IR wavenumber<br/>(<math>\text{cm}^{-1}</math>)</b> |
|---------------------------------------------------------------------|--------------------------------------------------------------------|
| 1445                                                                | 1442                                                               |
| 1395                                                                | 1395                                                               |
| 1287                                                                | 1277                                                               |
| 1214                                                                | 1203                                                               |
| 1187                                                                | 1179                                                               |
| 1124                                                                | 1107                                                               |
| 1061                                                                | 1044                                                               |
| 1016                                                                | 997                                                                |
| 927                                                                 | 903                                                                |
| 892                                                                 | 875                                                                |
| 790                                                                 | 773                                                                |
| 727                                                                 | 723                                                                |
| 681                                                                 | 676                                                                |
| 619                                                                 | 619                                                                |
| 500                                                                 | 528                                                                |
| 449                                                                 | 438                                                                |



**Table S5.** The variation of lattice constants versus temperatures for  $\text{Li}_4\text{Na}_2\text{CsB}_7\text{O}_{14}$ .

| Temperature (K) | $a$ (Å) | $b$ (Å) | $c$ (Å) | $\alpha$ (°) | $\beta$ (°) | $\gamma$ (°) | $V$ (Å <sup>3</sup> ) |
|-----------------|---------|---------|---------|--------------|-------------|--------------|-----------------------|
| 300             | 6.950   | 8.844   | 10.526  | 95.81        | 105.41      | 97.423       | 612.2518              |
| 400             | 6.9546  | 8.8741  | 10.557  | 95.78        | 105.70      | 97.37        | 615.7553              |
| 500             | 6.960   | 8.893   | 10.571  | 95.77        | 105.91      | 97.37        | 617.6842              |
| 600             | 6.969   | 8.908   | 10.607  | 95.75        | 105.84      | 97.34        | 621.0596              |
| 700             | 6.974   | 8.916   | 10.620  | 95.57        | 105.87      | 97.39        | 623.8260              |
| 800             | 6.976   | 8.941   | 10.641  | 95.65        | 105.96      | 97.50        | 626.3479              |
| 850             | 6.991   | 8.942   | 10.646  | 95.53        | 105.97      | 97.529       | 628.1661              |

**Table S6.** The expansivity, estimated standard deviation from room temperature to 850 K for  $\text{Li}_4\text{Na}_2\text{CsB}_7\text{O}_{14}$  and the components of principal axes relative to the crystallographic axes.

| Axes | $\alpha(\text{MK}^{-1})$ | $\sigma\alpha (\text{MK}^{-1})$ | <i>a</i> | <i>b</i> | <i>c</i> |
|------|--------------------------|---------------------------------|----------|----------|----------|
| X1   | 3.5181                   | 2.4716                          | 0.9231   | 0.0150   | 0.3843   |
| X2   | 17.0045                  | 1.9359                          | 0.2221   | 0.9736   | 0.0534   |
| X3   | 25.3882                  | 1.2023                          | 0.5306   | -0.1004  | -0.8417  |
| V    | 46.5986                  | 0.9670                          |          |          |          |

**Figure S1.** The experimental and calculated XRD patterns of  $\text{Li}_4\text{Na}_2\text{CsB}_7\text{O}_{14}$ .

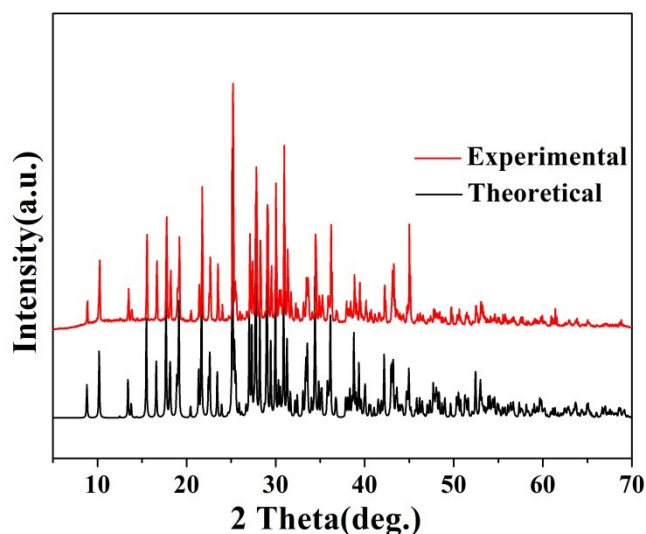

Single crystals of  $\text{Li}_4\text{Na}_2\text{CsB}_7\text{O}_{14}$  were obtained by high-temperature solution method using a LiF-CsF flux in an open system. The crystal structure was solved and refined based on the collected single crystal X-ray diffraction data, which confirms the existence of edge-sharing  $[\text{BO}_4]^{5-}$  tetrahedra. Polycrystalline sample of  $\text{Li}_4\text{Na}_2\text{CsB}_7\text{O}_{14}$  was obtained by solid-state reaction (Figure S1) in an open air and it is stable up to 638 °C without any weight loss, while there is only one obvious peak around 638 and 503 °C on the heating and cooling curves, respectively (Figure S2). Melting experiments demonstrate the incongruently melt behavior of  $\text{Li}_4\text{Na}_2\text{CsB}_7\text{O}_{14}$ , that is why the flux is needed for the crystal growth.

**Figure S2.** Thermal gravimetric analysis and differential scanning calorimetry curves of  $\text{Li}_4\text{Na}_2\text{CsB}_7\text{O}_{14}$ .

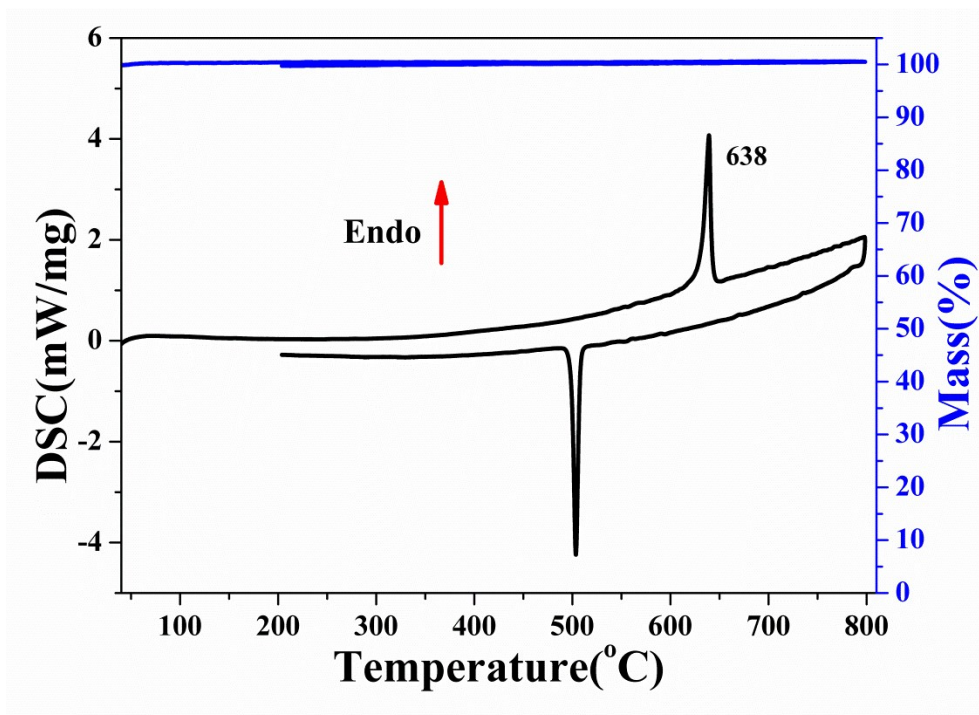

**Figure S3.** Electronic band structure of  $\text{Li}_4\text{Na}_2\text{CsB}_7\text{O}_{14}$ .

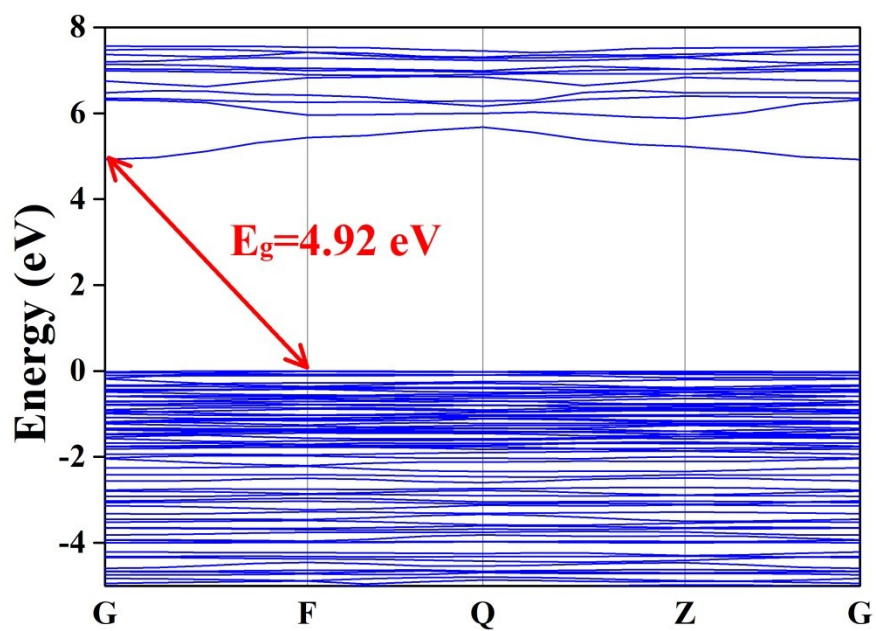

**Figure S4.** Partial and total density of states of  $\text{Li}_4\text{Na}_2\text{CsB}_7\text{O}_{14}$ .

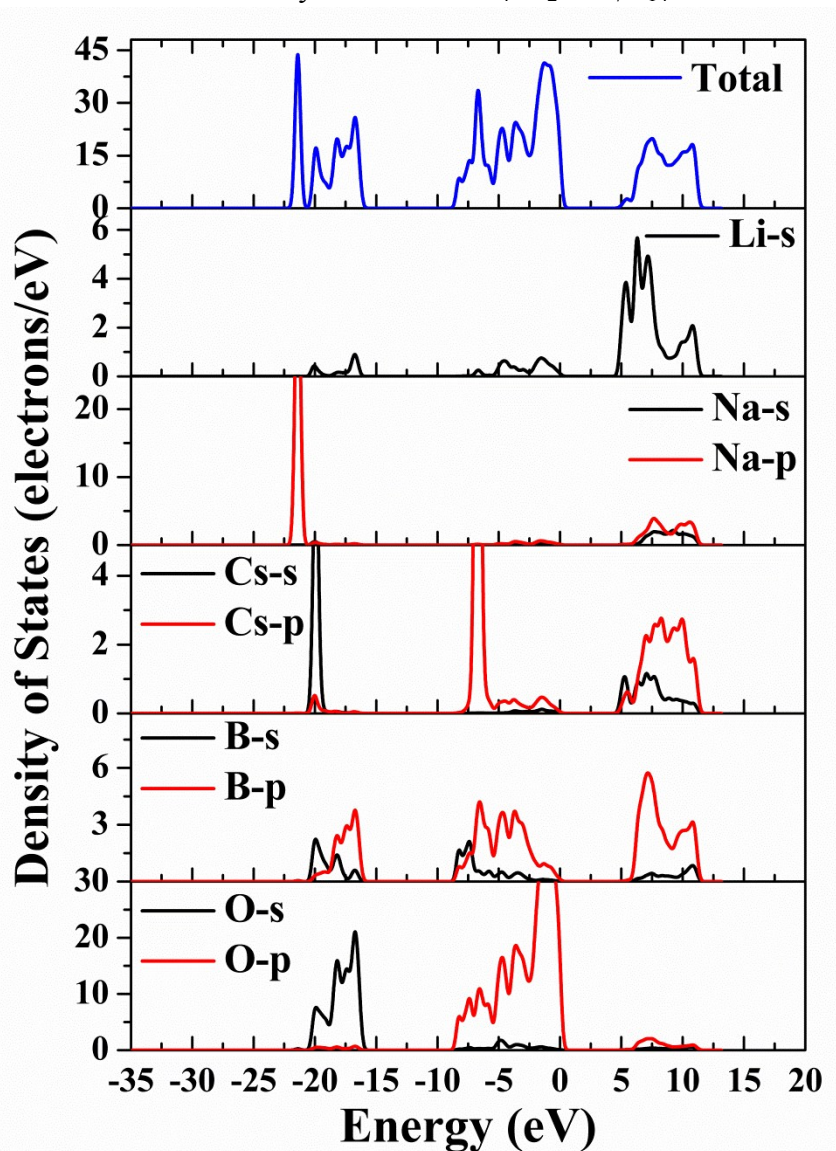

The electronic band structure and density of states show that  $\text{Li}_4\text{Na}_2\text{CsB}_7\text{O}_{14}$  has an indirect band gap of 4.93 eV obtained by GGA+PBE (Figure S3). The uppermost part of valence bands from -10 to 0 eV is essentially dominated by O 2p states and an appreciable contribution from Cs 2p and B 2p orbitals with a small amount of Li 2s states (Figure S4). The parts from -21.8 to -16.4 eV are mainly generated from O 2s, B 2s, and B 2p, indicating strong *sp* hybridization of B and O orbitals in the  $[\text{B}_{14}\text{O}_{28}]^{14-}$  basic blocks. While for the bottom of conduction band, it is composed of B 2p and M 2p (M = Li, Na, and Cs) orbitals. When taking together, we can conclude that the M-O and B-O interactions play a decisive role in determining the band gap of  $\text{Li}_4\text{Na}_2\text{CsB}_7\text{O}_{14}$ .

**Figure S5.** The highest occupied molecular orbital (a) and the lowest unoccupied molecular orbital (b) of edge-sharing  $[\text{BO}_4]^{5-}$  tetrahedra in  $\text{Li}_4\text{Na}_2\text{CsB}_7\text{O}_{14}$ .

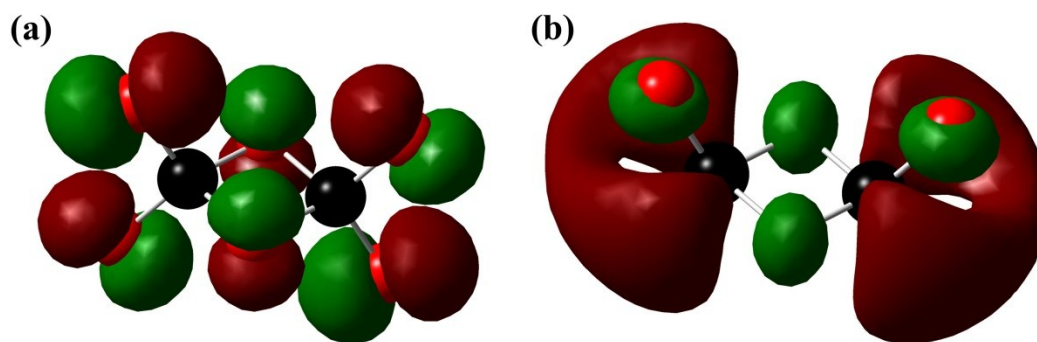

## Structure description

While the monovalent cations are 4, 5, 8, 14-coordinated into Li(1,2,4)O<sub>4</sub>, Li(3)O<sub>5</sub>, NaO<sub>8</sub>, and CsO<sub>14</sub> polyhedra to fill in the interstitial space and the important roles of these cations can be understood from the following aspects: (1) Those alkali metals free of *d-d* or *f-f* electronic transitions, which is beneficial for good transparency in the UV spectral region. (2) The large size atom (Cs) tends to make the whole construction with channels. (3) The chemical bonds of M-O (M = Li, Na and Cs) are typically electrovalent bonds, which can regulate the crystal structure.

## References

1. SAINT, *Version 7.60A*, Bruker Analytical X-ray Instruments, Inc., Madison, WI, 2008.
2. Sheldrick, G. M. *SHELXTL, version 6.12*; Bruker Analytical X-ray Instruments, Inc.: Madison, WI, 2001.
3. Spek, A. L.; *J. Appl. Crystallogr.* 2003, **36**, 7.
4. Rappe, A. M.; Rabe, K. M.; Kaxiras, E.; Joannopoulos, J. D. *Phys. Rev. B* 1990, **41**, 1227.
5. Lin, J. S.; Qteish, A.; Payne, M. C.; Heine, V. *Phys. Rev. B* 1993, **47**, 4174.
6. Lee, M. H. PhD. Thesis, The University of Cambridge 1996.
7. (a) Perdew, J. P.; Burke, K.; Ernzerhof, M. *Phys. Rev. Lett.* 1996, **77**, 3865; (b) Clark, S. J.; Segall, M. D.; Pickard, C. J.; Hasnip, P. J.; Probert, M. J.; Refson, K.; Payne, M. C. *Z. Kristallogr.* 2005, **220**, 567; (c) Heyd, J.; Scuseria, G. E.; Ernzerhof, M. *J. Chem. Phys.* 2003, **118**, 8207; (d) Krukau, A. V.; Vydrov, O. A.; Izmaylov, A. F.; Scuseria, G. E. *J. Chem. Phys.* 2006, **125**, 224106.
